# Supplementary material for: Baseline audiological profiling of South African females with cervical cancer: an important attribute for assessing cisplatin-associated ototoxicity
Source: Springer Nature journal article supplement (doi:10.1186/s12905-021-01313-5), 2021-04-20
Supplement: MOESM2 [file 19087186]

**Baseline Audiological Profiling of South African Females with Cervical Cancer: An Important Attribute for Assessing Cisplatin-Associated Ototoxicity**

<sup>1</sup>Jessica Paken, <sup>1</sup>Cyril D. Govender, <sup>1</sup>Mershen Pillay, <sup>2</sup>Birhanu T. Ayele, <sup>2</sup>Vikash Sewram

**SUPPLEMENTARY FILE 2: AUDIOLOGICAL PROCEDURE, MOTIVATION AND EQUIPMENT**

| <b>Audiological Procedure</b>                               | <b>Motivation</b>                                                                                                                                                                                                                                             | <b>Equipment</b>                                                        |
|-------------------------------------------------------------|---------------------------------------------------------------------------------------------------------------------------------------------------------------------------------------------------------------------------------------------------------------|-------------------------------------------------------------------------|
| 1. Case history interview                                   | <ul style="list-style-type: none"> <li>Allowed for accessing information on the presence of self-reported auditory and otologic symptoms such as tinnitus, otalgia and hearing difficulties as well as medical and family history of hearing loss.</li> </ul> | Case History questionnaire                                              |
| 2. Otoscope Examination                                     | <ul style="list-style-type: none"> <li>Determine the status of the tympanic membrane and the external ear [1].</li> </ul>                                                                                                                                     | Agine otoscope                                                          |
| 3. Tympanometry                                             | <ul style="list-style-type: none"> <li>Evaluate the integrity of middle ear functionality [2].</li> </ul>                                                                                                                                                     | GSI Tymstar V2<br>Impedance meter                                       |
| 4. Ipsilateral and contralateral acoustic reflex thresholds | <ul style="list-style-type: none"> <li>Provide information about the functioning of the middle ear and the sensory, neural, and motor pathways associated with the reflex arc [2].</li> </ul>                                                                 | GSI Tymstar V2<br>Impedance meter                                       |
| 5. Pure tone audiometry (air)                               | <ul style="list-style-type: none"> <li>Determine the type and degree of hearing loss [2].</li> </ul>                                                                                                                                                          | Conducted in a sound proof booth, using the twin channel Madsen Astera. |

|                             |                                                                                                                                                                                                                                                                                                                                                                                                                                                                                                                |                                                                                                                                                                                                                                                                                                                                                                                            |
|-----------------------------|----------------------------------------------------------------------------------------------------------------------------------------------------------------------------------------------------------------------------------------------------------------------------------------------------------------------------------------------------------------------------------------------------------------------------------------------------------------------------------------------------------------|--------------------------------------------------------------------------------------------------------------------------------------------------------------------------------------------------------------------------------------------------------------------------------------------------------------------------------------------------------------------------------------------|
| <p>and bone conduction)</p> | <ul style="list-style-type: none"> <li>• Pure tone air conduction thresholds were obtained bilaterally at the following frequencies: 125, 250, 500, 1000, 2000, 4000, 8000, 9000, 10000, 11200, 12500, 14000, 16000, 18000 and 20000 Hz, while bone conduction thresholds were obtained bilaterally at 250, 500, 1000, 2000 and 4000Hz.</li> </ul>                                                                                                                                                             |                                                                                                                                                                                                                                                                                                                                                                                            |
| <p>6. Speech audiometry</p> | <ul style="list-style-type: none"> <li>• Speech reception threshold (SRT) testing was used for the confirmation of pure tone thresholds which, alerts the audiologist to invalid pure tone results [2]. Word recognition score (WRS) testing was conducted to measure how well the listener could understand speech as a function of the ability to differentiate sounds under optimum circumstances. The score is intended to be a measure of the clarity with which the patient hears speech [2].</li> </ul> | <p>Speech audiometry was conducted using live voice monitoring in a sound proof booth, using the Madsen Astera. Speech lists used include the Digits test for SRT and the CID W-22 Auditory test word list for English speaking participants, while an isiZulu wordlist collated in the Discipline of Audiology, was used for isiZulu speakers, during word recognition score testing.</p> |

|                                                    |                                                                                                                                                                                                                          |                                    |
|----------------------------------------------------|--------------------------------------------------------------------------------------------------------------------------------------------------------------------------------------------------------------------------|------------------------------------|
| <p>7. Distortion Product Oto-acoustic emission</p> | <ul style="list-style-type: none"> <li>OAEs are sensitive to hearing losses, resulting from outer hair cell damage. OAE results assist with the differentiation of cochlear vs. retro-cochlear disorders [3].</li> </ul> | <p>Maico Oto-acoustic emission</p> |
|----------------------------------------------------|--------------------------------------------------------------------------------------------------------------------------------------------------------------------------------------------------------------------------|------------------------------------|

## References

1. Martin F, Clark J: **Introduction to audiology**, 10th ed edn. Pearson; 2009.
2. Gelfand SA: **Essentials of Audiology**, Fourth edn. New York: Thieme Publishers; 2016.
3. Robinette MS, Glatke TJ: **Otoacoustic emissions**. In: *Audiology diagnosis*. Edited by Roeser RJ, Valente M, Hosford-Dunn H. New York: Thieme Medical Publishers; 2000: 503-526.
