# Supplementary material for: Baseline audiological profiling of South African females with cervical cancer: an important attribute for assessing cisplatin-associated ototoxicity
Source: Springer Nature journal article supplement (doi:10.1186/s12905-021-01313-5), 2021-04-20
Supplement: MOESM4 [file 19087186]

**Baseline Audiological Profiling of South African Females with Cervical Cancer: An Important Attribute for Assessing Cisplatin-Associated Ototoxicity**

<sup>1</sup>Jessica Paken, <sup>1</sup>Cyril D. Govender, <sup>1</sup>Mershen Pillay, <sup>2</sup>Birhanu T. Ayele, <sup>2</sup>Vikash Sewram

**SUPPLEMENTARY FILE 4: LIMITS OF THE AUDIOMETER**

| <b>FREQUENCIES (Hz)</b> | <b>INTENSITY (dB)</b> |                 |
|-------------------------|-----------------------|-----------------|
|                         | <b>Right Ear</b>      | <b>Left ear</b> |
| <b>125</b>              | 80                    | 75              |
| <b>250</b>              | 100                   | 100             |
| <b>500</b>              | 115                   | 115             |
| <b>1000</b>             | 120                   | 120             |
| <b>2000</b>             | 115                   | 115             |
| <b>4000</b>             | 115                   | 115             |
| <b>8000</b>             | 100                   | 100             |
| <b>9000</b>             | 95                    | 95              |
| <b>10000</b>            | 90                    | 90              |
| <b>11200</b>            | 85                    | 85              |
| <b>12500</b>            | 75                    | 75              |
| <b>14000</b>            | 65                    | 70              |
| <b>16000</b>            | 50                    | 50              |
| <b>18000</b>            | 20                    | 25              |
| <b>20000</b>            | 0                     | 0               |
